# Supplementary material for: Chinese Sumac Fruits (Rhus chinesis Mill.) Alleviate Type 2 Diabetes in C57BL/6 Mice through Repairing Islet Cell Functions, Regulating IRS-1/PI3K/AKT Pathways and Promoting the Entry of Nrf2 into the Nucleus
Source: MDPI journal article supplement (doi:10.3390/nu15184080), 2023-09-21

# SUPPORTING INFORMATION

**Chinese sumac fruits (*Rhus chinensis* Mill.) alleviate type 2 diabetes in C57BL/6 mice through repairing islet cell function, regulating IRS-1/PI3K/AKT pathway and promoting the entry of Nrf2 into the nucleus**

Xiaojing Liu<sup>1,2,3</sup>, Shengbao Cai<sup>1,4,5</sup>, Junjie Yi<sup>1,4,5</sup>, Chuanqi Chu<sup>1,4,5\*</sup>

1 Faculty of Food Science and Engineering, Yunnan Institute of Food Safety, Kunming University of Science and Technology, Kunming, Yunnan Province, 650500, China

2 State Key Lab of Food Science and Technology, Jiangnan University, Wuxi, Jiangsu Province, 214122, China

3 Collaborative Innovation Center of Food Safety and Quality Control in Jiangsu Province, School of Food Science and Technology, Jiangnan University, Wuxi, Jiangsu Province, 214122, China

4 Yunnan Engineering Research Center for Fruit & Vegetable Products, Kunming, Yunnan Province 650500, China

5 Green Food Processing International Science and Technology R & D Center of Kunming City, Kunming, Yunnan Province 650500, China

Corresponding author

Chuanqi Chu

E-mail address: chuanqichu@aliyun.com

Table S1. Phytochemical identification of ethanol extracts from *Rhus chinensis* Mill. fruits by UHPLC-ESI-HRMS/MS

| Peak No. | Compounds                              | Retention Time (min) | [M-H] <sup>-</sup> (m/z) | Molecular Formula                               | MS2/MS fragment ions         |
|----------|----------------------------------------|----------------------|--------------------------|-------------------------------------------------|------------------------------|
| 1        | Malic acid                             | 1.28                 | 133.0131                 | C <sub>4</sub> H <sub>6</sub> O <sub>5</sub>    | 115.0024, 71.0125            |
| 2        | Citric acid                            | 1.67                 | 191.0190                 | C <sub>6</sub> H <sub>8</sub> O <sub>7</sub>    | 87.0074, 111.0075, 57.0332   |
| 3        | Gallic acid                            | 1.86                 | 169.0134                 | C <sub>7</sub> H <sub>6</sub> O <sub>5</sub>    | 69.0332, 125.0232, 124.0154  |
| 4        | Di-O-galloyl-glucoside                 | 2.47                 | 483.0779                 | C <sub>20</sub> H <sub>20</sub> O <sub>14</sub> | 169.0135, 125.0233, 331.0682 |
| 5        | Di-O-galloyl-glucoside (isomer)        | 3.00                 | 483.0777                 | C <sub>20</sub> H <sub>20</sub> O <sub>14</sub> | 169.0134, 125.0233, 331.0674 |
| 6        | Protocatechuic acid                    | 3.05                 | 153.0186                 | C <sub>7</sub> H <sub>6</sub> O <sub>4</sub>    | 108.0204, 109.0288, 91.0176  |
| 7        | Digallic acid I                        | 4.02                 | 321.0256                 | C <sub>14</sub> H <sub>9</sub> O <sub>9</sub>   | 125.0233, 169.0135           |
| 8        | Trigalloyl glucose I                   | 4.67                 | 635.0900                 | C <sub>27</sub> H <sub>24</sub> O <sub>18</sub> | 169.0134, 635.0901, 483.0786 |
| 9        | Digallic acid II                       | 4.96                 | 321.0255                 | C <sub>14</sub> H <sub>10</sub> O <sub>9</sub>  | 125.0233, 169.0135           |
| 10       | Trigalloyl glucose II                  | 5.85                 | 635.0887                 | C <sub>27</sub> H <sub>24</sub> O <sub>18</sub> | 635.0900, 169.0134, 483.0786 |
| 11       | Myricetin-3-O- (6''-galloyl) glycoside | 8.29                 | 631.0950                 | C <sub>28</sub> H <sub>23</sub> O <sub>17</sub> | 479.08369, 631.0956          |
| 12       | Myricetin-3-O-galactoside              | 9.12                 | 479.0878                 | C <sub>21</sub> H <sub>20</sub> O <sub>13</sub> | 316.0226, 317.0277           |
| 13       | Tetragalonyl glucose                   | 9.45                 | 787.1008                 | C <sub>34</sub> H <sub>28</sub> O <sub>22</sub> | 169.0134, 635.0898           |
| 14       | Myricetin-3-O-rhamnoside               | 9.86                 | 463.0889                 | C <sub>21</sub> H <sub>20</sub> O <sub>12</sub> | 316.0227, 317.0285           |
| 15       | Luteolin-7-O-glucoside                 | 10.09                | 447.0941                 | C <sub>21</sub> H <sub>20</sub> O <sub>11</sub> | 285.0407, 284.0329           |
| 16       | Quercetin-3-O-arabinoside              | 10.45                | 433.0783                 | C <sub>20</sub> H <sub>18</sub> O <sub>11</sub> | 300.0279, 301.0331           |
| 17       | Quercetin-3-O-rhamnoside               | 10.69                | 447.0934                 | C <sub>21</sub> H <sub>20</sub> O <sub>11</sub> | 300.0279, 301.0351           |
| 18       | Myricetin O-gallate                    | 11.07                | 615.1002                 | C <sub>28</sub> H <sub>24</sub> O <sub>16</sub> | 317.0305, 169.0134           |
| 19       | Kaempferol-3-O-hexoside                | 11.34                | 431.0986                 | C <sub>21</sub> H <sub>20</sub> O <sub>10</sub> | 284.0330, 285.0406, 255.0300 |
| 20       | Anacardic acid (17:3)                  | 23.17                | 369.2437                 | C <sub>24</sub> H <sub>34</sub> O <sub>3</sub>  | 119.0490, 325.2539           |
| 21       | Anacardic acid (15:1)                  | 24.18                | 345.2439                 | C <sub>22</sub> H <sub>34</sub> O <sub>3</sub>  | 301.2538                     |
| 22       | Anacardic acid (17:2)                  | 24.84                | 371.2596                 | C <sub>24</sub> H <sub>36</sub> O <sub>3</sub>  | 327.2696                     |

Figure S1. The chromatograms of phenolic-rich fraction from *Rhus chinensis* Mill. Peak identification and their MS data are shown in Table S1.

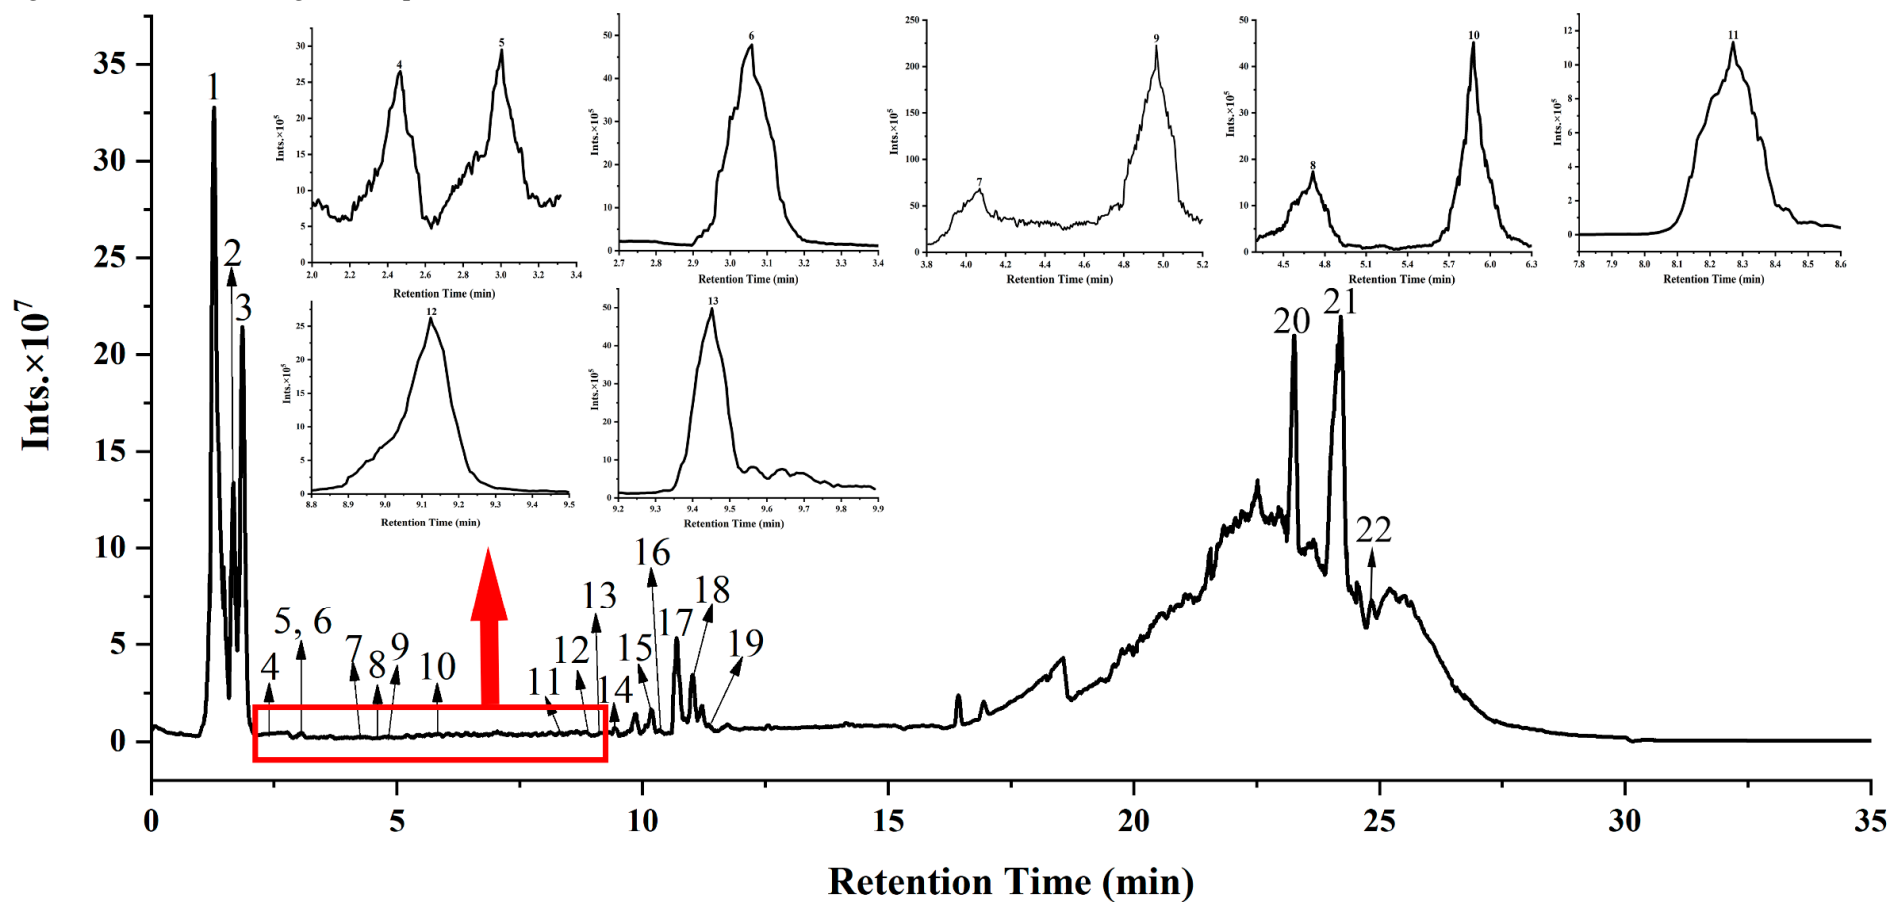

Supplement: s1 [file s1]
